# Supplementary material
Source: PubMed Central journal article supplement (PMC8128592)
Supplement: tables0816.pdf [file tables0816.pdf]

**On-line Table: Clinical data: 27 patients identified with solid organ transplantation**

| Pt#/Age/Sex/Tx | Reason for Tx      | Clinical Features at Toxicity |        |             |     |          |                                                        |     |      |       |
|----------------|--------------------|-------------------------------|--------|-------------|-----|----------|--------------------------------------------------------|-----|------|-------|
|                |                    | Neurotoxicity                 | Δ t    | BP Toxicity | MAP | FK (CsA) | Associated Clinical Problem: Severe Infection/Other    | CMV | Rej  | Ed gr |
| Liver          |                    |                               |        |             |     |          |                                                        |     |      |       |
| 1-73/M/L       | Cholangitis-Cir    | Δms                           | 11d    | 140/76      | 97  | 21       | BC+ <i>Staphylococcus</i> coag neg (-4d)               | +   | mild | 3     |
| 2-27/M/L-SB    | Cryptogenic-Cir    | sz                            | 14d    | 150/80      | 103 | 17       | Wound+ <i>Enterococcus faecium</i> (0d)                | +   |      | 2     |
| 3-51/M/L       | ETOH-cir/HepC      | Δms                           | 16d    | 161/91      | 113 | 10.7     | BC+ <i>Enterococcus faecium</i> (0d)                   | +   |      | 3     |
| 4-67/F/L       | Biliary-Cir        | sz                            | 20d    | 193/95      | 122 | 13       | BC+ <i>Staphylococcus aureus</i> (-5d)                 | +   | mod  | 3     |
| 5-46/F/L       | ETOH-Cir           | sz                            | 21d    | 198/100     | 132 | 15       | BC+ <i>Staphylococcus</i> coag neg (13d)               | +   | mod  | 3     |
| 6-69/F/L       | Cryptogenic-Cir    | Δms/sz                        | 26d    | 120/70      | 86  | 19       |                                                        | +   |      | 2     |
| 7-61/F/L       | HepC               | ha/Δms/sz                     | 48d    | 186/90      | 120 | 21.6     | Biliary obstruction; pancreatitis                      |     |      | 3     |
| 8-44/M/L       | ETOH-Cir           | Δms/sz                        | 56d    | 118/72      | 87  | 17       | BC+ <i>Pseudomonas</i> (-17d)                          | +   | mod  | 3     |
| 9-56/M/L       | ETOH-Cir/HepC      | sz                            | 68d    | 144/66      | 92  | 16       | Empyema+ <i>Pseudomonas</i> (-8d)                      |     |      | 5     |
| 10-50/F/L      | HepC               | Δms/sz                        | 173d   | 137/75      | 94  | 21       | Peritonitis+ <i>Candida</i>                            |     |      | 3     |
|                |                    |                               |        |             |     |          | BC+ <i>Staphylococcus</i> coag pos (-23d)              |     |      |       |
|                |                    |                               |        |             |     |          | BC+ <i>Staphylococcus</i> coag pos (-6d)               |     |      |       |
| Lung           |                    |                               |        |             |     |          |                                                        |     |      |       |
| 11-34/M/Lu     | CF                 | sz                            | 64d    | 145/95      | 111 | 13       |                                                        |     | mild | 3     |
| 12-22/F/Lu     | CF                 | ha/sz                         | 102d   | 124/75      | 91  | 18       | Pneumonia+ <i>Streptococcus viridans, Candida</i> (8d) |     | mild | 1     |
| 13-59/F/Lu     | COPD               | Δms/sz                        | 104d   | 173/87      | 110 | 20       |                                                        |     | mild | 1     |
| SB             |                    |                               |        |             |     |          |                                                        |     |      |       |
| 14-24/F/SB     | Malabsorption      | ha/vis/sz                     | 179d   | 138/98      | 109 | 19       |                                                        |     | mod  | 2     |
| Heart          |                    |                               |        |             |     |          |                                                        |     |      |       |
| 15-50/M/Ht     | HTN                | ha/sz                         | 206d   | 180/110     | 133 | 15       | BC+ <i>Staphylococcus</i> coag neg (30d)               |     | mod  | 1     |
| 16-36/F/Ht-Lu  | Pul-HTN/emph       | ha/vis                        | 283d   | 115/80      | 91  | (93)     |                                                        | +   | mod  | 1     |
| 17-58/M/Ht     | CIHD               | vis                           | 14 mo  | 162/92      | 113 | (420)    | Pleural+ <i>Staphylococcus</i> coag neg (-16d)         | +   | mild | 2     |
| 18-67/M/Ht     | CIHD               | vis/Δms/sz                    | 53 mo  | 154/90      | 110 | 15       |                                                        |     | mild | 2     |
| Kidney         |                    |                               |        |             |     |          |                                                        |     |      |       |
| 19-38/M/K-P    | Diabetes/CRF       | Δms                           | 236d   | 209/120     | 149 | 3.3      | BC+ coag neg <i>Staphylococcus</i> (-23d)              |     | sev  | 1     |
| 20-54/F/K      | CRF                | ha                            | 14 mo  | 192/82      | 117 | 7        | Pneumonia, sepsis + <i>Moraxella</i> (4d)              |     |      | 2     |
| 21-59/F/K      | HTN                | Δms                           | 17 mo  | 220/100     | 139 | 11       | Pneumonia, aspiration                                  |     | mild | 1     |
| 22-27/M/K      | Nephritis/CRF      | sz                            | 34 mo  | 230/140     | 169 | 12       | Colitis+ CMV*                                          |     | sev  | 1     |
| 23-55/F/K      | Membranous GN      | ha/sz                         | 35 mo  | 235/145     | 177 | 3        | Fist-Phleb                                             |     | mild | 2     |
| 24-53/M/K      | Membranous GN      | sz                            | 48 mo  | 210/108     | 137 | 8        | Drug use                                               |     |      | 2     |
| 25-45/F/K-P    | Diabetes/CRF       | sz                            | 89 mo  | 180/92      | 120 | 10       |                                                        |     |      | 1     |
| 26-57/F/K      | Polycystic disease | Δms                           | 102 mo | 220/115     | 149 | 9        | Renal hemorrhage/shock                                 | +   | mod  | 2     |
| 27-45/M/K      | Alport syndrome    | Δms/sz                        | 120 mo | 192/98      | 129 | 4        | Renal cyst+ <i>Enterococcus</i> (9d)                   |     |      | 2     |
|                |                    |                               |        |             |     |          | Empyema+ <i>Streptococcus</i> (-37d)                   |     | mod  | 2     |
|                |                    |                               |        |             |     |          | Lung abscess+ <i>Streptococcus</i> (-34d)              |     |      |       |

**Note:**—Pt# indicates patient number; F, female; M, male; Tx, organ transplant; L, liver; SB, small bowel; Lu, lung; K, kidney; K-P, kidney-pancreas; Ht, heart; Cir, cirrhosis; ETOH-Cir, alcoholic cirrhosis; HepC, hepatitis C infection; CF, cystic fibrosis; COPD, chronic obstructive pulmonary disease; MAP, mean arterial pressure; HTN, hypertension; Pul-HTN/emph, pulmonary HTN and emphysema; CIHD, chronic ischemic heart disease; CRF, chronic renal failure; GN, glomerulonephritis; ha, headache; vis, vision change; Δms, mental status change, confusion, obtundation; sz, seizure; Δ t, time point PRES develops after Tx; d, days; mo, months; BP toxicity and MAP, mmHg; FK, tacrolimus level at toxicity in ng/mL; CsA, cyclosporine level at toxicity in ng/mL; BC, blood culture; Rej, active organ rejection at time of toxicity; mod, moderate rejection; sev, severe rejection; CMV, new cytomegalovirus expression (typically reactivation, identified after toxicity); CMV\*, new onset CMV colitis; Fist-phleb, dialysis fistula phlebitis; Drug use, suspected narcotic/cocaine overdose; Ed gr, edema grade.
